# Supplementary material for: The Pig: A Relevant Model for Evaluating the Neutrophil Serine Protease Activities during Acute Pseudomonas aeruginosa Lung Infection
Source: PubMed Central journal article supplement (PMC5161375; doi:10.1371/journal.pone.0168577), 2016-12-16
Supplement: pone.0168577.s002.pdf [file pone.0168577.s002.pdf]

**S1 Table. Health status of pigs.** The pigs used for the study were obtained from a herd seronegative for the following common diseases.

| <b>Bacteria</b>                        | <b>Virus</b>                                            |
|----------------------------------------|---------------------------------------------------------|
| <i>Mycoplasma hyopneumoniae</i>        | Hepatitis E virus                                       |
| <i>Actinobacillus pleuropneumoniae</i> | Classical Swine Fever virus                             |
| <i>Bordetella bronchiseptica</i>       | African Swine fever virus                               |
| <i>Pasteurella multocida</i>           | Border Disease virus                                    |
| <i>Haemophilus suis</i>                | Aujeszky's disease virus                                |
| <i>Streptococcus suis de type 2</i>    | Swine diarrhea virus                                    |
| <i>Brachyspira hyodysenteriae</i>      | Swine respiratory coronavirus                           |
| <i>Lawsonia intracellularis</i>        | Porcine reproductive respiratory syndrome virus (PRRSV) |
| <i>Brucella suis</i>                   | Porcine Parvovirus (PPV)                                |
| <i>Listeria monocytogenes</i>          | Influenza virus type A (H1N1, H1N2, H3N2 and pH1N1)     |
| <i>Campylobacter spp.</i>              | Porcine circovirus type 2                               |
